# Supplementary material for: Homochiral zinc phosphonates with layered and open framework structures using polycarboxylate as second linkers
Source: Royal Society of Chemistry journal article supplement (doi:10.1039/b914583d), 2009-01-01
Supplement: b914583d.pdf [file b914583d.pdf]

## Supporting Information

### Homochiral Zinc Phosphonates with Layered and Open Framework Structures Using Polycarboxylate as Second Linkers

Xun-Gao Liu, Song-Song Bao, Jian Huang, Yi-Zhi Li, Li-Min Zheng\*

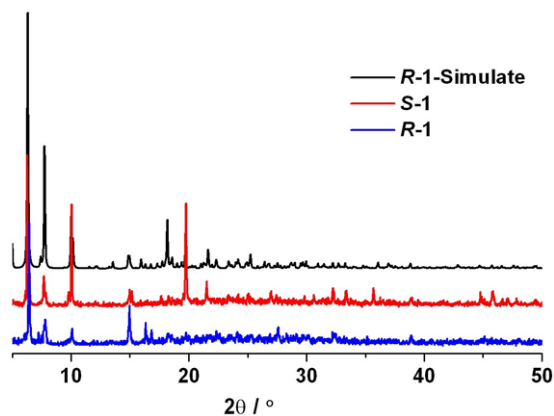

Figure S1 XRD curves for compounds *S-1* and *R-1*.

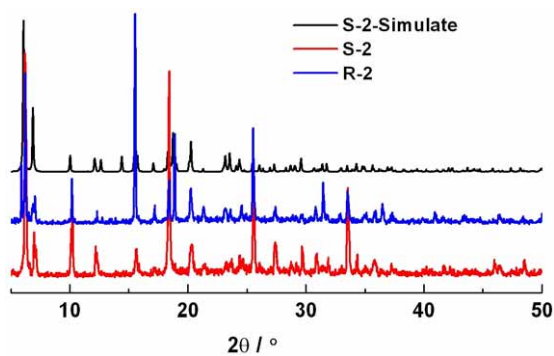

Figure S2 XRD curves for compounds *S-2* and *R-2*.

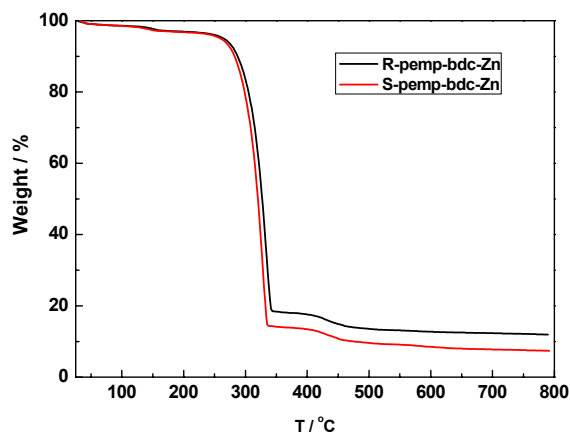

Figure S3 Thermal analyses for *R-1* and *S-1*.

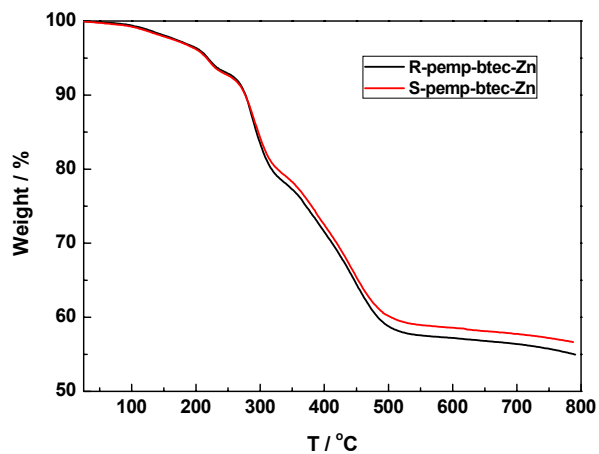

**Figure S4** Thermal analyses for *R-2* and *S-2*.

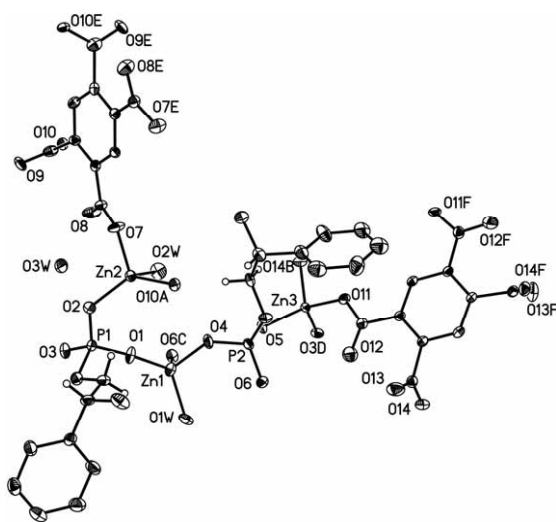

**Figure S5** Coordination geometries of zinc in *R-2* with atomic labeling scheme. Thermal ellipsoids are at the 30% probability level. All H atoms except those attached to N and chiral C atoms are omitted for clarity.

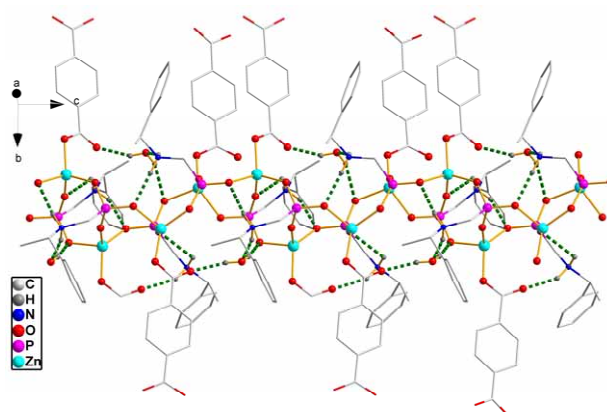

**Fig. S6** The hydrogen bonds within chain in compound S-1.

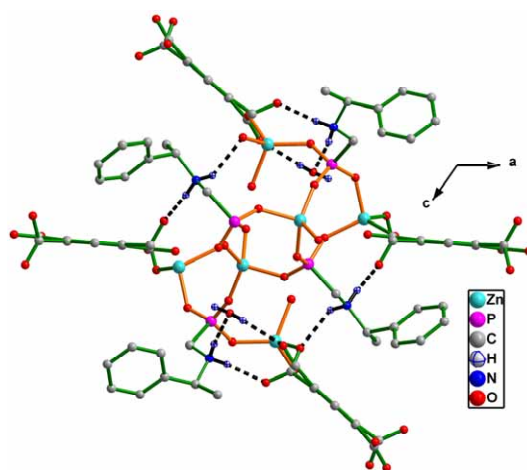

**Fig. S7** The hydrogen bonds within chain in compound S-2.
